# Supplementary material for: Greener aromatic antioxidants for aviation and beyond
Source: Royal Society of Chemistry journal article supplement (doi:10.1039/c9se01148j), 2020-01-01
Supplement: c9se01148j1.pdf [file c9se01148j1.pdf]

## Greener aromatic antioxidants for aviation and beyond

Dirk Volker Woortman<sup>a,h</sup>, Sophie Jürgens<sup>c</sup>, Martin Untergehrer<sup>b</sup>, Julia Rechenberger<sup>e</sup>, Monika Fuchs<sup>a</sup>, Norbert Mehlmer<sup>a</sup>, Farah Qoura<sup>a,h</sup>, Georg Eckel<sup>c</sup>, Michael Stöhr<sup>c</sup>, Patrick Oßwald<sup>c</sup>, Patrick Le Clercq<sup>c</sup>, Lukas Hintermann<sup>f,g</sup>, Dirk Weuster-Botz<sup>d,h</sup> and Franz Bracher<sup>b</sup> and Thomas Brück<sup>a,h\*</sup>

- a. \* Technical University of Munich, Werner Siemens-Chair of Synthetic Biotechnology, Lichtenbergstrasse 4, 85748 Garching, Germany.  
E-mail: brueck@tum.de; Tel: +49-89-289-13253  
b. Ludwig Maximilian University of Munich, Department of Pharmacy - Center for Drug Research, Butenandtstrasse 5-13, 81377 Munich, Germany  
c. German Aerospace Center (DLR), Institute of Combustion Technology, Pfaffenwaldring 38-40, 70569 Stuttgart, Germany  
d. Technical University of Munich, Institute of Biochemical Engineering, Boltzmannstrasse 15, 85748 Garching, Germany  
e. Technical University of Munich, Chair of Proteomics and Bioanalytics, Emil-Erlenmeyer-Forum 5, 85354 Freising, Germany  
f. Technical University of Munich, Catalysis Research Center, Ernst-Otto-Fischer-Strasse 1, 85748 Garching, Germany  
g. Technical University of Munich, Department of Chemistry, Lichtenbergstrasse 4, 85748 Garching, Germany  
h. Technical University of Munich, AlgaeTec Centre, Ludwig Bölkow Campus, Willy-Messerschmitt-Strasse 1, 82024 Taufkirchen, Germany

### <sup>1</sup>H and <sup>13</sup>C -NMR spectra of SXLC and DHIRC

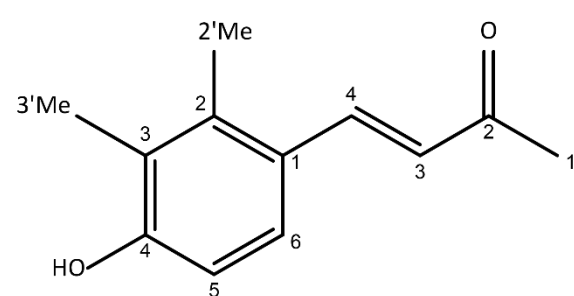

(E)-4-(4-hydroxy-2,3-dimethylphenyl)but-3-en-2-one

"SXLC"

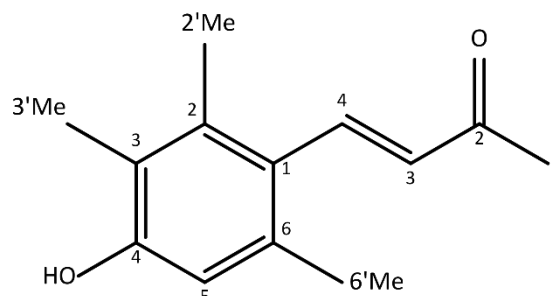

(E)-4-(4-hydroxy-2,3,6-trimethylphenyl)but-3-en-2-one

"DHIRC"

Fig. S1 Chemical structures and IUPAC names of the synthesized compounds.

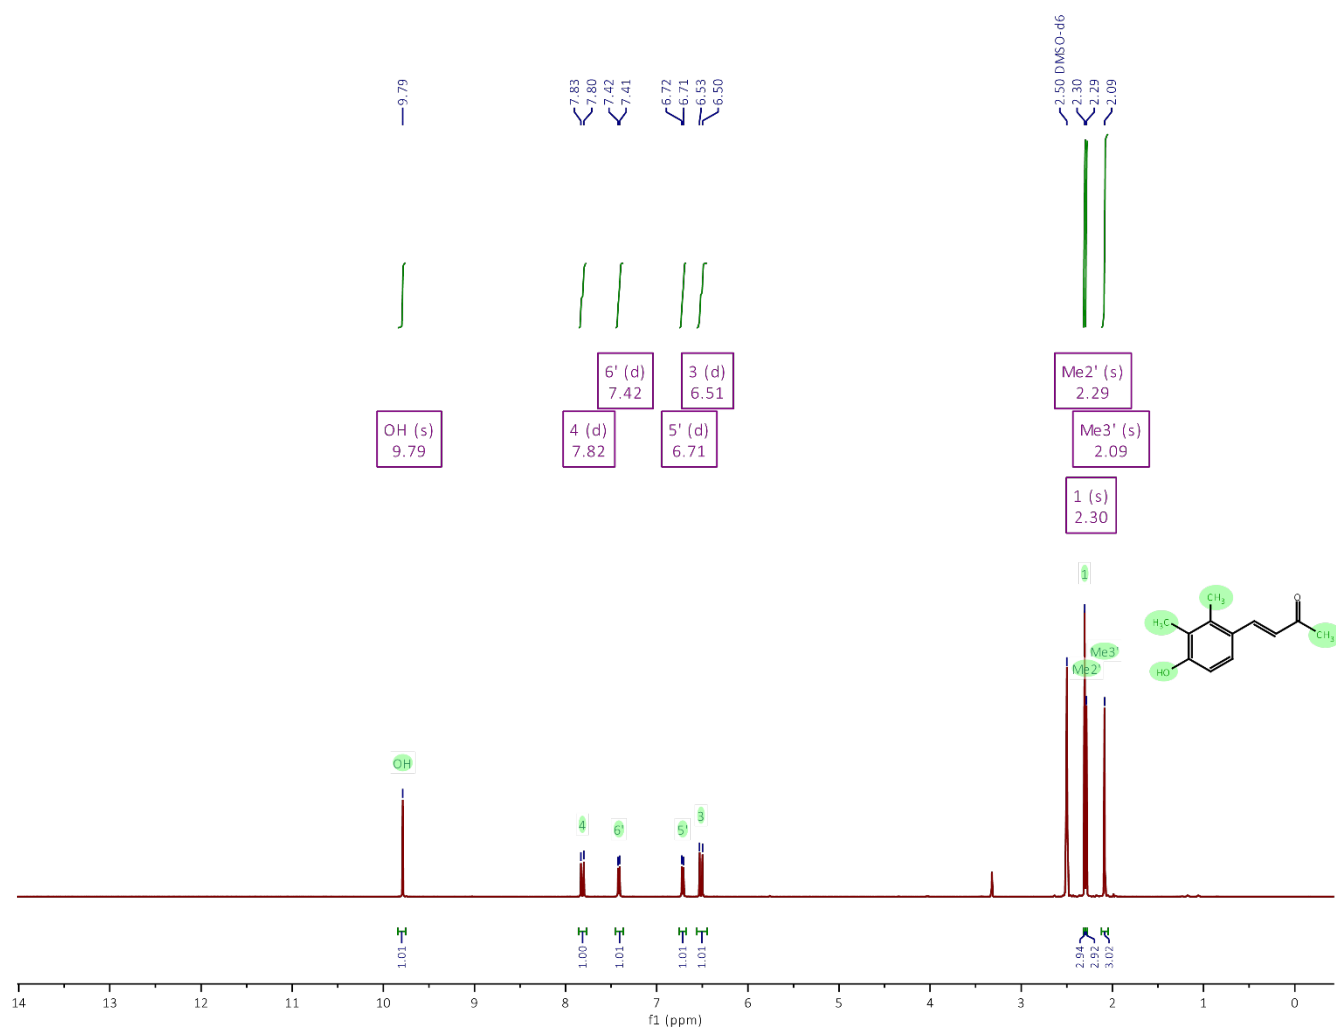Fig. S2  $^1\text{H}$ -NMR - SXLC

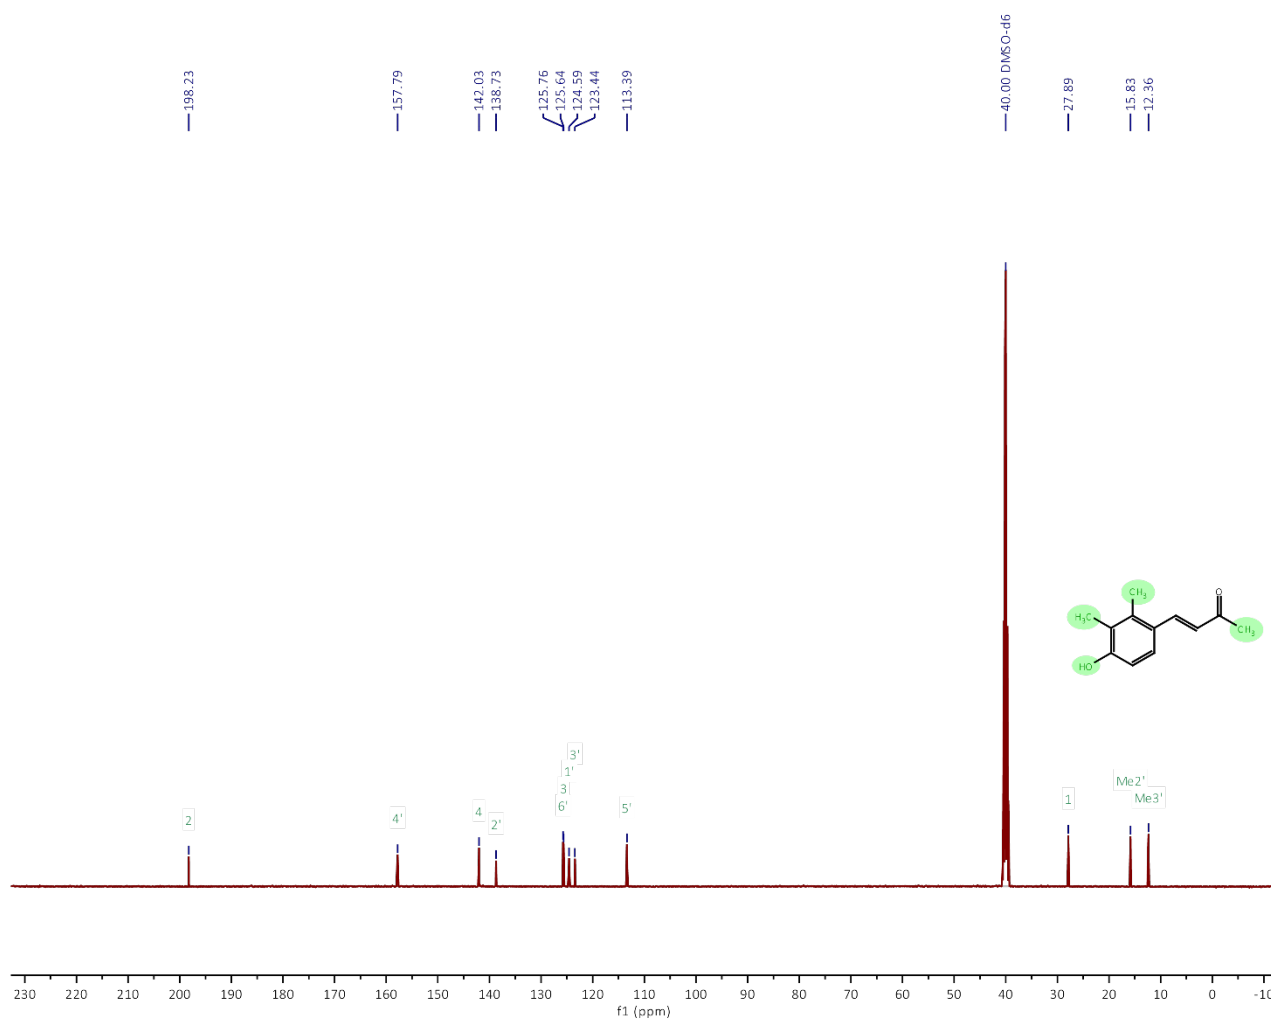**Fig. S3** <sup>13</sup>C-NMR - SXLC

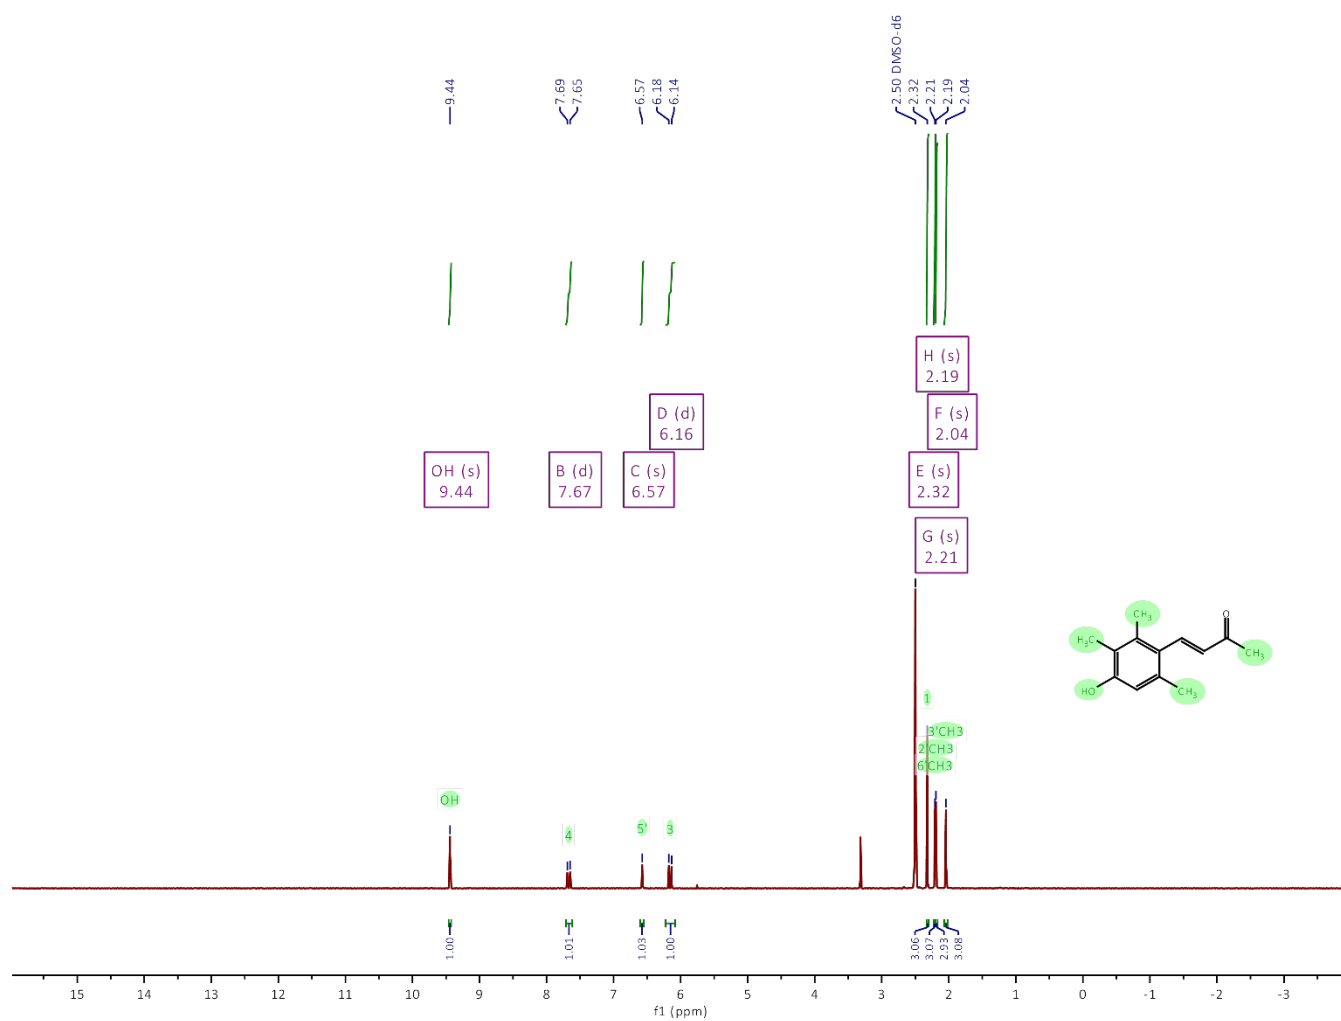**Fig. S4** <sup>1</sup>H-NMR - DHIRC

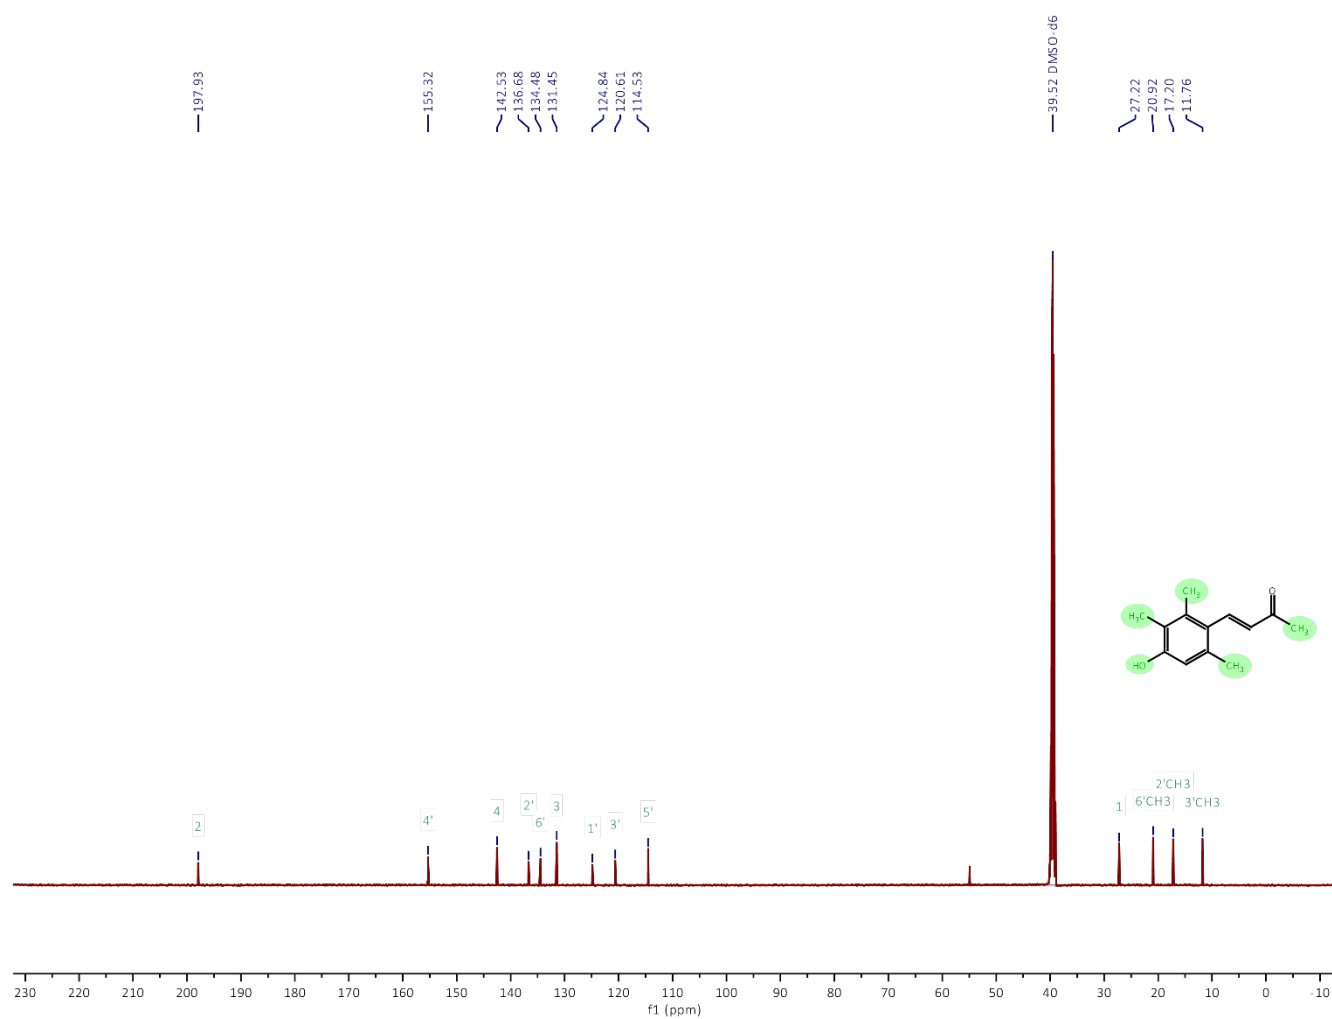**Fig. S5** <sup>13</sup>C-NMR - DHIRC

### Images of additional combustion experiments at droplet channel test rig.

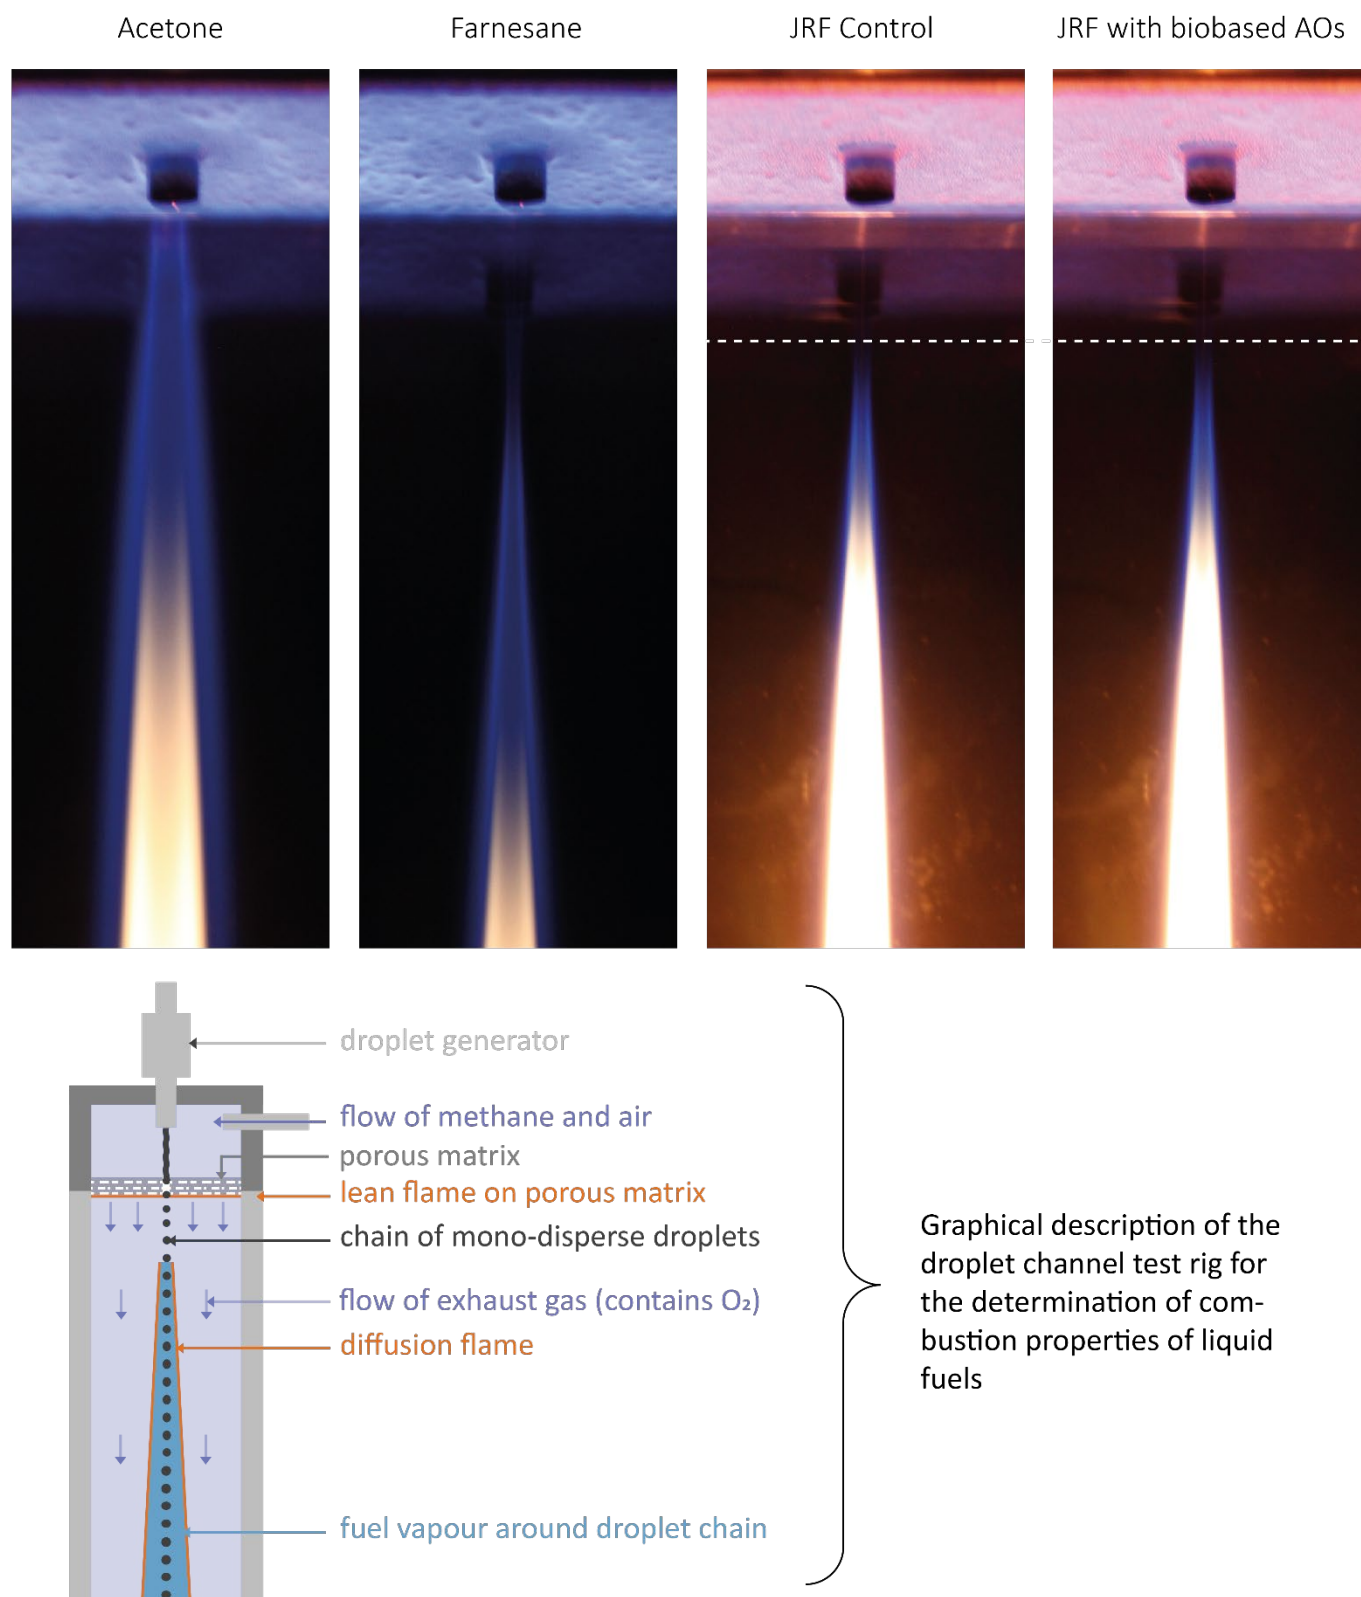

**Fig. S6** Combustion experiments with droplet channel test. Images characterise evaporation and combustion properties of liquid fuels. Large differences can be observed, e.g., between farnesane and acetone. No appreciable effects of studied biobased antioxidant on evaporation and combustion of jet reference fuel blends (JRF) were detected.

Absorption curves of ABTS and DPPH assays at various concentrations.

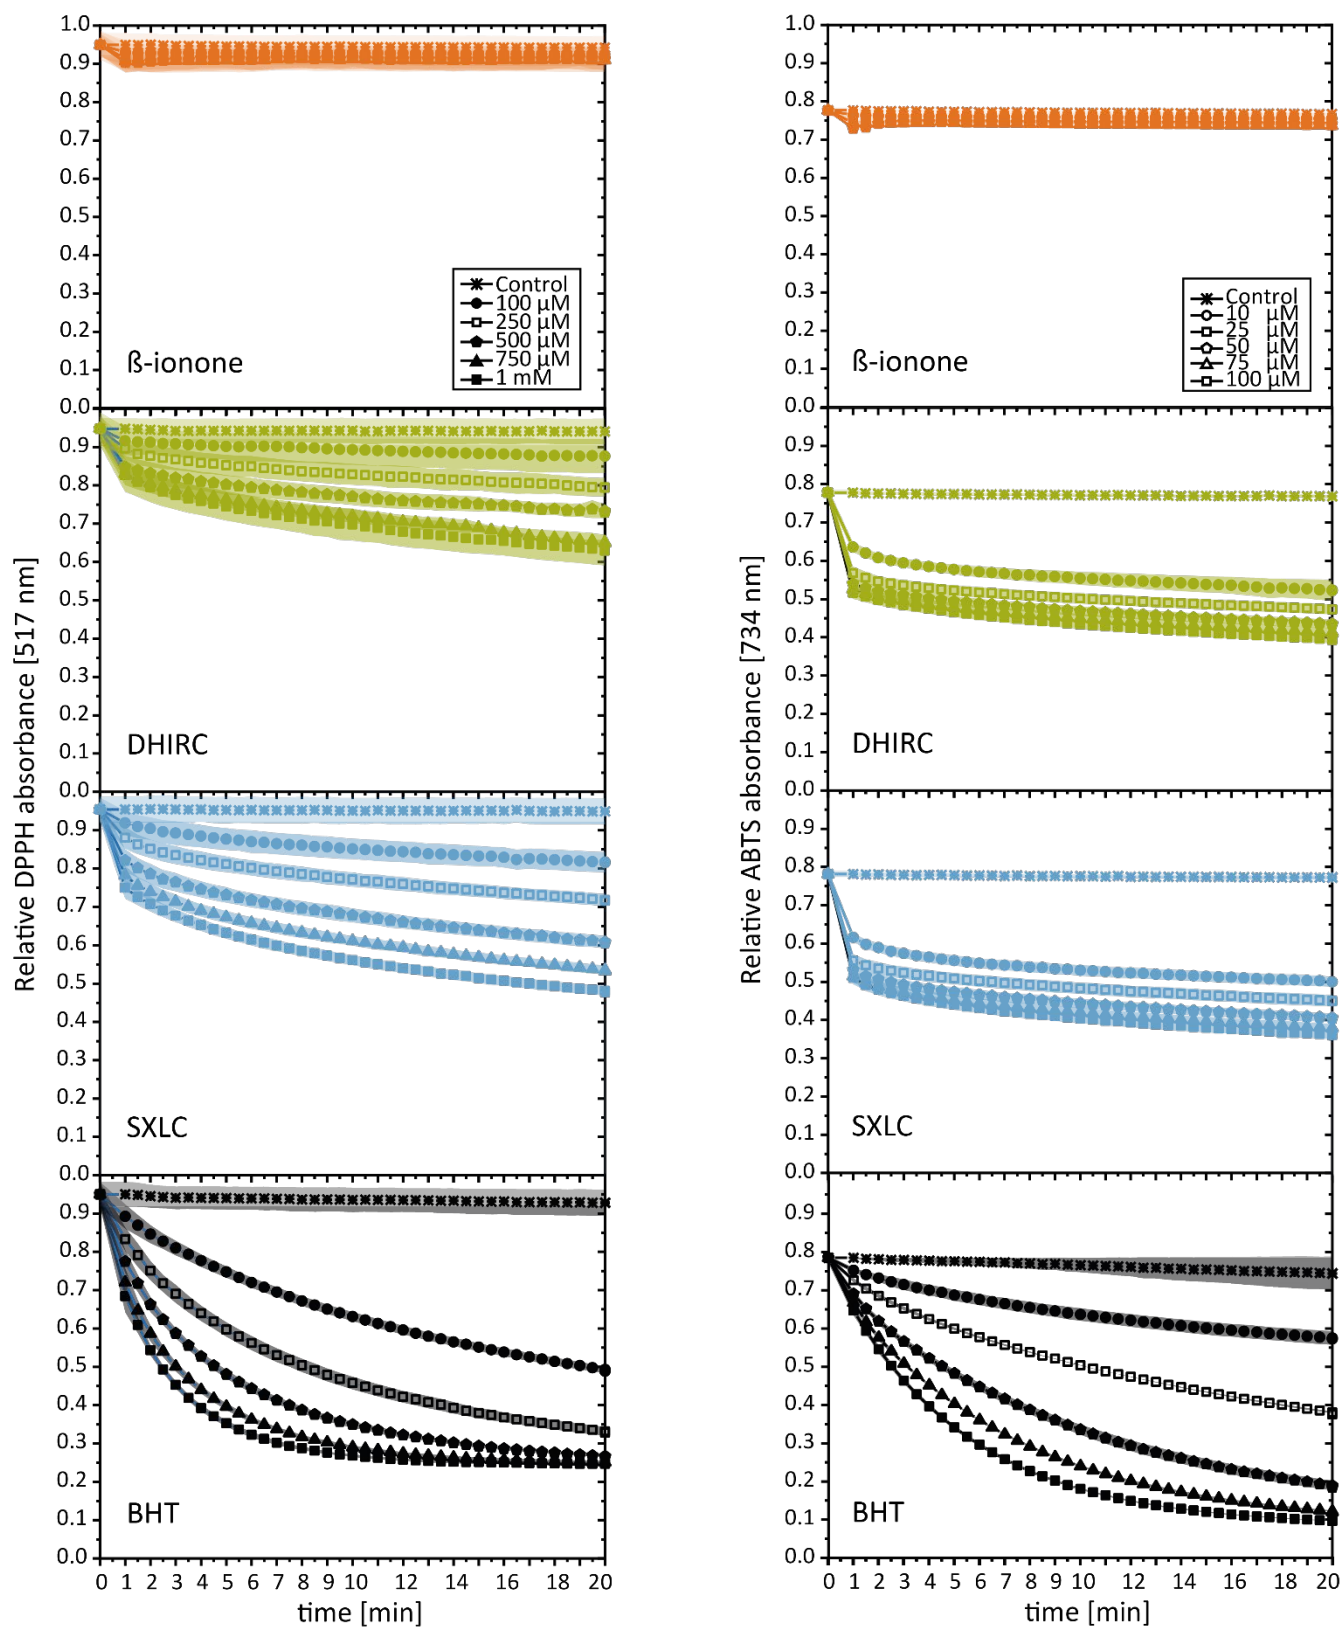

Fig. S7 Additional spectrophotometric ABTS and DPPH radical absorption quenching curves at various concentrations with labels according to the analysed antioxidant candidate.



**IncuCyte® images of SK-MEL-28 cells.**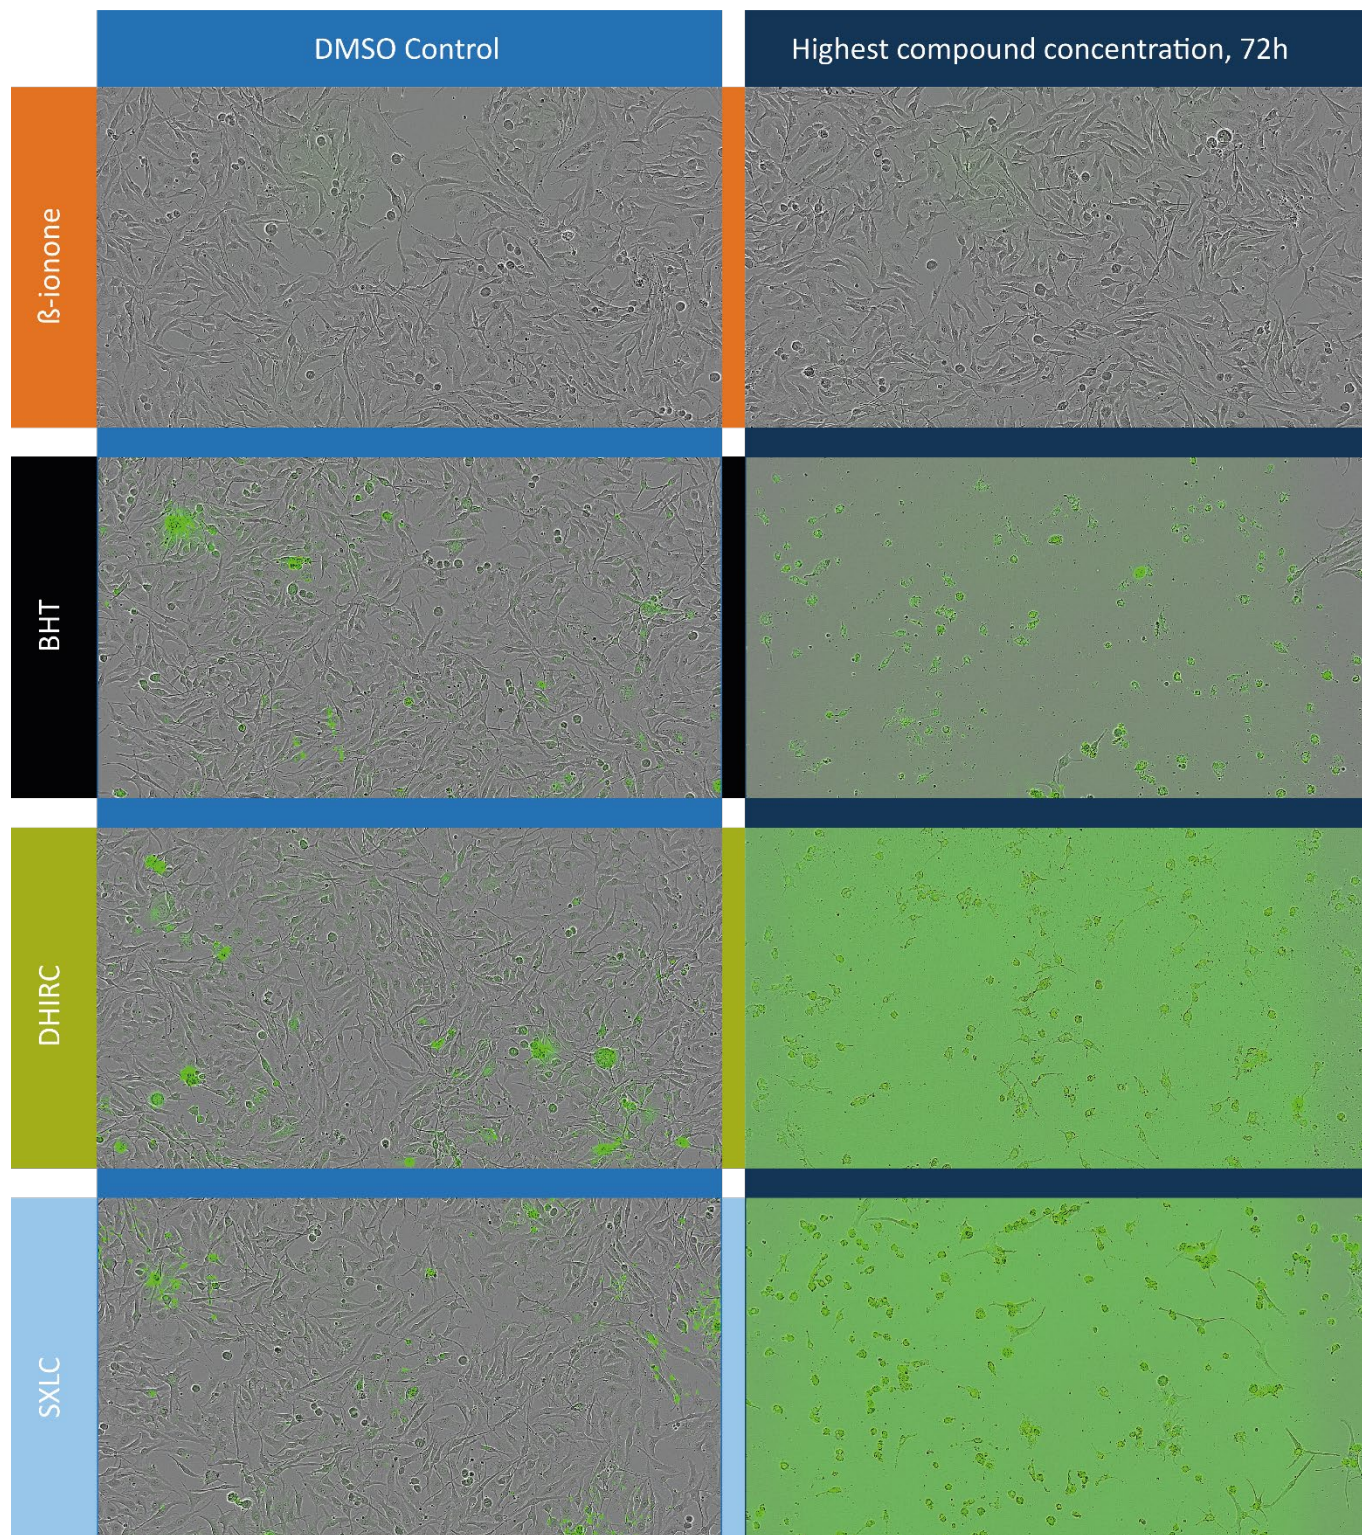

**Fig. S8** Images of SK-MEL-28 cell line treated with compounds in accordance to the figure labelling at a concentration of 30  $\mu$ M. All raw images were acquired with an IncuCyte® device.
